# Supplementary material
Source: PubMed Central journal article supplement (PMC5675167)
Supplement: mmc1.pdf [file mmc1.pdf]

**YMTHE, Volume 25**

**Supplemental Information**

**Adipose Stem Cell Therapy Mitigates  
Chronic Pancreatitis via Differentiation  
into Acinar-like Cells in Mice**

**Zhen Sun, Wenyu Gou, Do-sung Kim, Xiao Dong, Charlie Strange, Yu Tan, David B. Adams, and Hongjun Wang**

## Supplemental Data:

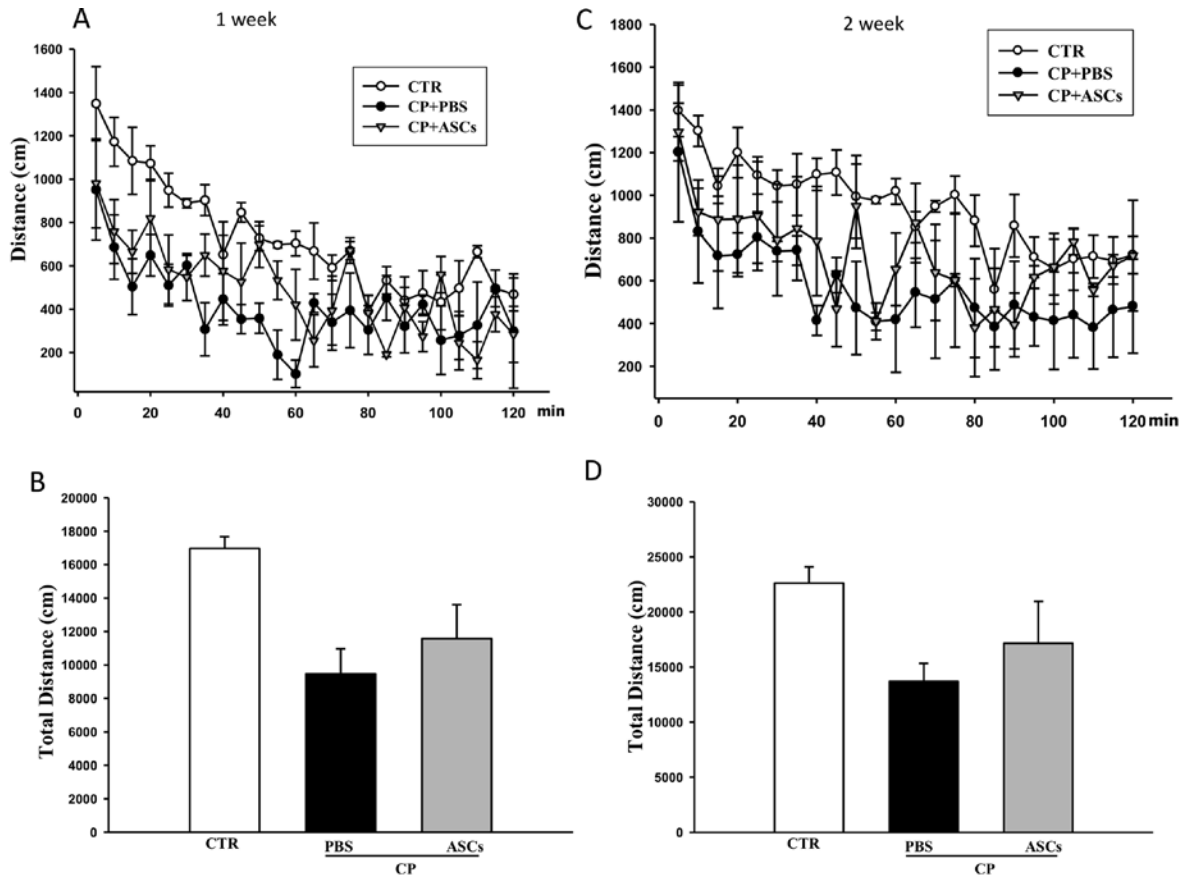

**Fig S1. Physical activity of mice.** (A) Distance traveled in 5-minute intervals and (B) total distance traveled within 120 min 1 week after treatment. (C) Distance traveled in 5-minute intervals and (D) total distance traveled within 120 min 2 weeks after treatment. CTR: Normal mice receiving PBS; CP+PBS: CP mice receiving PBS; ASCs: CP mice receiving ASCs. Results shown are representative of at least 3 independent experiments (n=6–8 per group for each experiment). \*P < 0.05 vs. CTR.

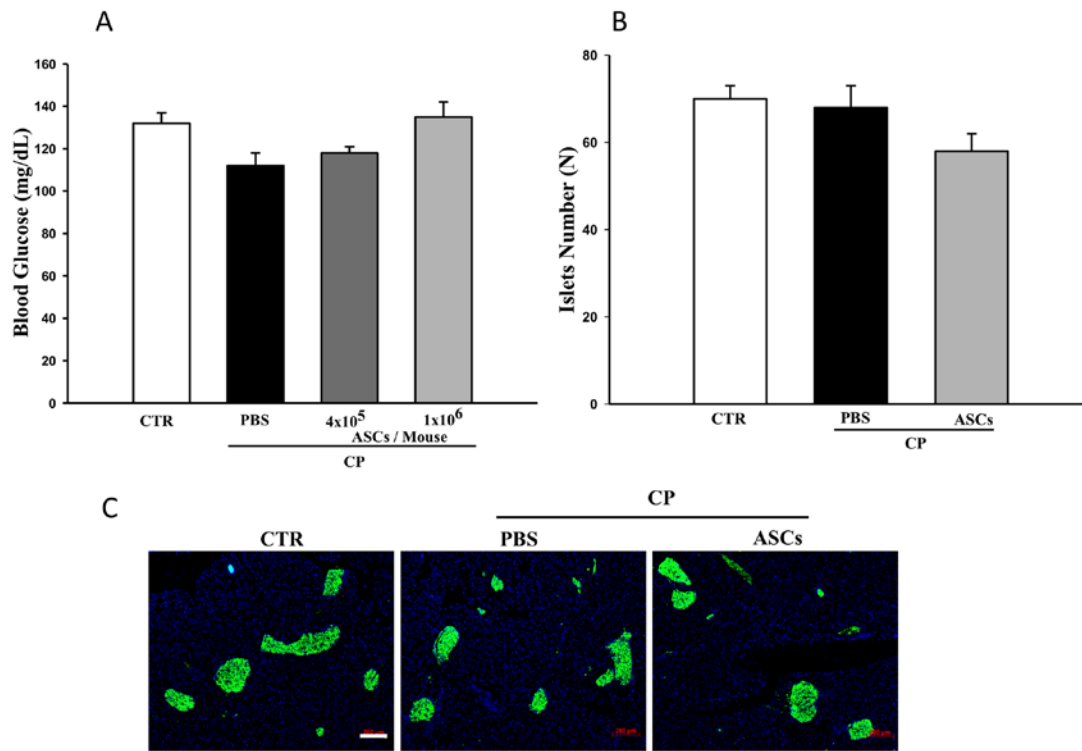

**Fig S2. The impact of ASC injection on pancreatic  $\beta$  cell mass.** (A) Blood glucose levels determined two weeks after injections. Normal control and CP control mice received PBS; CP mice received  $4 \times 10^5$  or  $1 \times 10^6$  ASCs per mouse. (B) Average number of islets per pancreatic section. ASCs: CP mice received  $4 \times 10^5$  ASCs per mouse. (C) Immunohistochemical staining of pancreas from normal control mice, CP mice treated with PBS, or CP mice treated with ASCs. Green indicates insulin staining. Scale bar=200  $\mu$ m. At least 3 mice were included in each group.
